# Supplementary material
Source: MDPI journal article supplement (https://www.mdpi.com/2075-163X/9/7/439)
Supplement: s1 [file s1]

**Table S4.** Mean, minimum, maximum and Standard Deviation (St.D.) of Ce, Eu and Y anomalies and of rare earth elements plus yttrium calculated on the LA-ICP-MS data of the selected laminae.

|                                                                       |       | Ce anomaly | Eu anomaly | Y Anomaly | La  | Ce   | Pr  | Ns  | Sm | Eu  | Gd | Tb  | Dy | Y   | Ho  | Er  | Tm  | Yb  | Lu  |
|-----------------------------------------------------------------------|-------|------------|------------|-----------|-----|------|-----|-----|----|-----|----|-----|----|-----|-----|-----|-----|-----|-----|
| <b>Hydrogenetic <math>n = 29</math></b>                               |       |            |            |           |     |      |     |     |    |     |    |     |    |     |     |     |     |     |     |
| DR02-10                                                               | Mean  | 2.5        | 1.0        | 0.7       | 344 | 1550 | 68  | 283 | 59 | 13  | 61 | 9   | 54 | 202 | 10  | 28  | 4   | 25  | 4   |
|                                                                       | Min.  | 1.0        | 1.0        | 0.6       | 273 | 893  | 48  | 201 | 40 | 10  | 45 | 7   | 41 | 169 | 8   | 25  | 4   | 23  | 3   |
|                                                                       | Max.  | 4.3        | 1.1        | 0.7       | 440 | 2340 | 95  | 385 | 79 | 19  | 82 | 11  | 66 | 238 | 12  | 34  | 4   | 28  | 4   |
|                                                                       | St.D. | 1.4        | 0.0        | 0.0       | 57  | 601  | 17  | 65  | 14 | 3   | 14 | 2   | 10 | 25  | 2   | 3   | 0   | 2   | 0   |
| DR07-9                                                                | Mean  | 3.1        | 1.1        | 0.6       | 272 | 1664 | 58  | 242 | 49 | 12  | 49 | 7   | 41 | 131 | 8   | 22  | 3   | 19  | 3   |
|                                                                       | Min.  | 1.9        | 1.0        | 0.5       | 106 | 591  | 23  | 99  | 22 | 6   | 23 | 4   | 22 | 82  | 4   | 13  | 2   | 12  | 2   |
|                                                                       | Max.  | 4.6        | 1.3        | 0.7       | 440 | 2220 | 86  | 360 | 71 | 18  | 83 | 12  | 73 | 269 | 14  | 41  | 5   | 36  | 5   |
|                                                                       | St.D. | 0.8        | 0.1        | 0.1       | 81  | 456  | 16  | 67  | 12 | 3   | 15 | 2   | 13 | 50  | 2   | 8   | 1   | 7   | 1   |
| DR16-14                                                               | Mean  | 1.9        | 1.1        | 0.6       | 460 | 1868 | 107 | 425 | 87 | 20  | 82 | 12  | 73 | 225 | 13  | 36  | 5   | 30  | 4   |
|                                                                       | Min.  | 1.9        | 1.0        | 0.6       | 380 | 1600 | 90  | 360 | 73 | 17  | 66 | 10  | 62 | 198 | 11  | 30  | 4   | 27  | 4   |
|                                                                       | Max.  | 2.0        | 1.2        | 0.6       | 517 | 2060 | 118 | 476 | 97 | 24  | 91 | 14  | 83 | 253 | 14  | 41  | 5   | 34  | 5   |
|                                                                       | St.D. | 0.0        | 0.1        | 0.0       | 62  | 214  | 14  | 52  | 12 | 3   | 11 | 2   | 9  | 26  | 2   | 5   | 1   | 4   | 1   |
| 107-11H                                                               | Mean  | 4.4        | 1.0        | 0.7       | 353 | 2727 | 63  | 264 | 52 | 12  | 56 | 8   | 50 | 207 | 10  | 30  | 4   | 27  | 4   |
|                                                                       | Min.  | 3.2        | 1.0        | 0.7       | 242 | 1940 | 46  | 192 | 37 | 9   | 40 | 6   | 35 | 147 | 7   | 21  | 3   | 19  | 3   |
|                                                                       | Max.  | 5.9        | 1.1        | 0.8       | 457 | 3580 | 84  | 349 | 68 | 15  | 72 | 11  | 62 | 254 | 13  | 38  | 5   | 33  | 5   |
|                                                                       | St.D. | 1.0        | 0.0        | 0.0       | 73  | 660  | 13  | 54  | 11 | 2   | 11 | 2   | 10 | 43  | 2   | 6   | 1   | 6   | 1   |
| <b>Diagenetic <math>n = 10</math></b>                                 |       |            |            |           |     |      |     |     |    |     |    |     |    |     |     |     |     |     |     |
| DR02-10                                                               | Mean  | 0.6        | 1.1        | 0.9       | 16  | 19   | 4   | 16  | 5  | 0.9 | 4  | 0.5 | 3  | 17  | 0.6 | 1.8 | 0.2 | 1.6 | 0.2 |
|                                                                       | Min.  | 0.4        | 0.7        | 0.8       | 11  | 11   | 3   | 14  | 3  | 0.7 | 2  | 0.4 | 2  | 9   | 0.4 | 1.1 | 0.1 | 0.9 | 0.1 |
|                                                                       | Max.  | 1.0        | 1.5        | 1.1       | 20  | 25   | 5   | 20  | 8  | 1.2 | 5  | 0.7 | 5  | 27  | 0.9 | 2.7 | 0.4 | 2.3 | 0.3 |
|                                                                       | St.D. | 0.2        | 0.3        | 0.1       | 4   | 5    | 1   | 3   | 2  | 0.2 | 1  | 0.1 | 1  | 6   | 0.2 | 0.6 | 0.1 | 0.5 | 0.1 |
| DR07-9                                                                | Mean  | 0.7        | 1.1        | 0.6       | 21  | 38   | 7   | 25  | 5  | 1   | 6  | 1   | 4  | 17  | 1   | 2   | 0.4 | 2   | 0.3 |
|                                                                       | Min.  | 0.4        | 0.9        | 0.5       | 11  | 22   | 2   | 10  | 2  | 0.4 | 2  | 0.3 | 2  | 5   | 0.3 | 1   | 0.1 | 1   | 0.1 |
|                                                                       | Max.  | 1.2        | 1.3        | 0.9       | 36  | 50   | 19  | 53  | 11 | 3   | 14 | 1   | 9  | 50  | 2   | 5   | 1   | 4   | 1   |
|                                                                       | St.D. | 0.4        | 0.2        | 0.2       | 12  | 12   | 7   | 18  | 4  | 1   | 5  | 1   | 3  | 19  | 1   | 2   | 0.3 | 1   | 0.3 |
| <b>Early Diagenetic <math>n = 10</math></b>                           |       |            |            |           |     |      |     |     |    |     |    |     |    |     |     |     |     |     |     |
| DR07-9                                                                | Mean  | 2.5        | 1.1        | 0.6       | 35  | 190  | 8   | 37  | 8  | 2   | 9  | 1   | 8  | 29  | 2   | 4   | 1   | 4   | 1   |
|                                                                       | Min.  | 2.0        | 0.8        | 0.5       | 16  | 84   | 4   | 15  | 4  | 1   | 3  | 0.5 | 3  | 10  | 1   | 2   | 0.3 | 2   | 0.2 |
|                                                                       | Max.  | 3.5        | 1.3        | 0.9       | 57  | 273  | 13  | 60  | 12 | 3   | 15 | 2   | 13 | 56  | 3   | 7   | 1   | 8   | 1   |
|                                                                       | St.D. | 0.5        | 0.2        | 0.1       | 14  | 62   | 3   | 15  | 3  | 1   | 4  | 1   | 3  | 15  | 1   | 2   | 0.3 | 2   | 0.2 |
| <b>Hydrogenetic/Hydrothermal Fe-Oxihydroxides <math>n = 11</math></b> |       |            |            |           |     |      |     |     |    |     |    |     |    |     |     |     |     |     |     |
| DR16-14                                                               | Mean  | 2.1        | 1.1        | 0.8       | 151 | 726  | 35  | 148 | 36 | 8   | 38 | 6   | 40 | 162 | 7   | 22  | 3   | 21  | 3   |

|                                                                      |       |     |     |     |     |      |    |     |    |    |    |    |    |     |    |    |   |    |   |
|----------------------------------------------------------------------|-------|-----|-----|-----|-----|------|----|-----|----|----|----|----|----|-----|----|----|---|----|---|
|                                                                      | Min.  | 1.2 | 1.0 | 0.7 | 61  | 208  | 15 | 64  | 18 | 4  | 22 | 3  | 22 | 104 | 5  | 14 | 2 | 14 | 2 |
|                                                                      | Max.  | 3.1 | 1.1 | 0.8 | 372 | 2330 | 81 | 324 | 75 | 16 | 70 | 11 | 71 | 259 | 13 | 36 | 5 | 32 | 5 |
|                                                                      | St.D. | 0.7 | 0.0 | 0.1 | 129 | 817  | 29 | 115 | 26 | 5  | 24 | 4  | 23 | 69  | 4  | 10 | 1 | 8  | 1 |
| 107-11H                                                              | Mean  | 4.4 | 1.0 | 0.7 | 177 | 1614 | 39 | 172 | 39 | 9  | 44 | 6  | 41 | 166 | 8  | 23 | 3 | 21 | 3 |
|                                                                      | Min.  | 3.7 | 1.0 | 0.7 | 118 | 1200 | 17 | 74  | 16 | 4  | 20 | 3  | 21 | 94  | 4  | 13 | 2 | 12 | 2 |
|                                                                      | Max.  | 5.0 | 1.1 | 0.8 | 219 | 1990 | 46 | 203 | 48 | 11 | 51 | 8  | 48 | 192 | 9  | 27 | 4 | 24 | 4 |
|                                                                      | St.D. | 0.5 | 0.0 | 0.1 | 38  | 338  | 12 | 56  | 13 | 3  | 13 | 2  | 11 | 41  | 2  | 6  | 1 | 5  | 1 |
| <b>Hydrothermal/Hydrogenetic Fe-Oxihydroxides <math>n = 2</math></b> |       |     |     |     |     |      |    |     |    |    |    |    |    |     |    |    |   |    |   |
|                                                                      | Mean  | 3.9 | 1.0 | 0.9 | 60  | 554  | 12 | 53  | 14 | 3  | 15 | 2  | 17 | 85  | 4  | 11 | 2 | 11 | 2 |
|                                                                      | Min.  | 3.9 | 1.0 | 0.8 | 50  | 413  | 10 | 43  | 12 | 3  | 13 | 2  | 15 | 77  | 3  | 10 | 2 | 9  | 2 |
|                                                                      | Max.  | 4.0 | 1.0 | 0.9 | 74  | 837  | 14 | 63  | 15 | 4  | 18 | 3  | 19 | 95  | 4  | 12 | 2 | 12 | 2 |
|                                                                      | St.D. | 0.0 | 0.1 | 0.0 | 11  | 192  | 2  | 9   | 2  | 0  | 2  | 0  | 2  | 8   | 0  | 1  | 0 | 1  | 0 |
| <b>Hydrothermal Fe-Oxihydroxides <math>n = 2</math></b>              |       |     |     |     |     |      |    |     |    |    |    |    |    |     |    |    |   |    |   |
| 107-11H                                                              | Mean  | 1.7 | 1.0 | 1.0 | 28  | 97   | 6  | 27  | 7  | 2  | 9  | 2  | 11 | 66  | 2  | 8  | 1 | 9  | 1 |
|                                                                      | Min.  | 1.7 | 1.0 | 0.9 | 18  | 68   | 4  | 19  | 5  | 1  | 7  | 1  | 9  | 58  | 2  | 7  | 1 | 8  | 1 |
|                                                                      | Max.  | 1.8 | 1.1 | 1.1 | 37  | 127  | 8  | 35  | 10 | 2  | 11 | 2  | 14 | 75  | 3  | 9  | 1 | 11 | 2 |
|                                                                      | St.D. | 0.1 | 0.1 | 0.1 | 13  | 42   | 3  | 11  | 3  | 1  | 3  | 1  | 3  | 12  | 1  | 2  | 0 | 2  | 0 |
| <b>Hydrothermal Altered Rock <math>n = 4</math></b>                  |       |     |     |     |     |      |    |     |    |    |    |    |    |     |    |    |   |    |   |
| 107-11H                                                              | Mean  | 0.6 | 1.2 | 1.4 | 22  | 7    | 4  | 13  | 3  | 1  | 3  | 0  | 4  | 39  | 1  | 3  | 0 | 3  | 1 |
|                                                                      | Min.  | 0.1 | 0.9 | 1.1 | 9   | 6    | 1  | 5   | 1  | 0  | 2  | 0  | 2  | 20  | 1  | 1  | 0 | 2  | 0 |
|                                                                      | Max.  | 1.8 | 1.7 | 1.6 | 42  | 8    | 7  | 20  | 4  | 2  | 5  | 1  | 6  | 62  | 2  | 5  | 1 | 5  | 1 |
|                                                                      | St.D. | 0.8 | 0.4 | 0.2 | 17  | 1    | 3  | 7   | 2  | 1  | 2  | 0  | 2  | 21  | 0  | 2  | 0 | 2  | 0 |
