# Supplementary material
Source: MDPI journal article supplement (https://www.mdpi.com/2075-163X/9/7/439)
Supplement: s1 [file s1]

**Table S1.** XRF Uncertainty calculated using several reference materials.

| Parameter                      | Ref. Mat. | Reference Value (%) | U (%)*U* | Relative Uncertainty | U Interval (%)*        |
|--------------------------------|-----------|---------------------|----------|----------------------|------------------------|
| SiO <sub>2</sub>               | DC71306   | 0.62                |          | 5.90                 |                        |
|                                | NBS-1B    | 4.92                |          | 2.22                 |                        |
|                                | SO-3C     | 17.74               |          | 0.94                 | 0.5–4.5 (U = 5.9)      |
|                                | DC72301   | 34.34               |          | 2.62                 | 4.5–98.0 (U = 2.6)     |
|                                | GBW07104  | 60.62               |          | 1.13                 |                        |
|                                | BCS-314   | 96.20               |          | 0.68                 |                        |
| Al <sub>2</sub> O <sub>3</sub> | DC72301   | 0.67                |          | 10.58                |                        |
|                                | BCS-372   | 5.35                |          | 11.57                | 0.5–15 (U = 11.57)     |
|                                | GBW07104  | 16.17               |          | 3.78                 | 15–62 (U = 3.78)       |
|                                | BCS-309   | 61.10               |          | 2.40                 |                        |
| FeO <sup>T</sup>               | DC71036   | 0.20                |          | 8.72                 |                        |
|                                | BCS-309   | 1.51                |          | 9.55                 | 0.20–5.0 (U = 9.55)    |
|                                | DC 72301  | 6.90                |          | 2.92                 | 5.0–25.00 (U = 2.92)   |
|                                | GBW07105  | 13.40               |          | 1.60                 |                        |
|                                | DC71304   | 24.75               |          | 0.85                 |                        |
| CaO                            | DC71305   | 0.59                |          | 6.80                 |                        |
|                                | BCS-314   | 1.81                |          | 4.00                 |                        |
|                                | DC71304   | 9.86                |          | 5.87                 | 0.60–10.0 (U = 6.80)   |
|                                | DC71306   | 30.02               |          | 3.47                 | 10.0–56.0 (U = 3.47)   |
|                                | IPT-35    | 53.80               |          | 3.20                 |                        |
|                                | DC71305   | 0.30                |          | 8.37                 |                        |
| TiO <sub>2</sub>               | BCS-309   | 1.92                |          | 5.20                 | 0.30–3.0 (U = 8.37)    |
|                                | DC71304   | 7.69                |          | 1.28                 | 3.0–8.0 (U = 1.28)     |
|                                | BCS-372   | 0.026               |          | 9.31                 |                        |
| MnO                            | GBW 07104 | 0.077               |          | 2.80                 |                        |
|                                | NIM-P     | 0.22                |          | 8.77                 |                        |
|                                | NIM-L     | 0.77                |          | 6.78                 | 0.05–0.80 (U = 9.31)   |
|                                | BCS-309   | 0.46                |          | 19.94                |                        |
| K <sub>2</sub> O               | DC71305   | 5.43                |          | 2.70                 | 0.40–2.0 (U = 19.94)   |
|                                | NIM-S     | 15.50               |          | 1.79                 | 2.0–15.5 (U = 2.77)    |
|                                | NIM-S     | 0.46                |          | 7.96                 |                        |
| MgO                            | DC71304   | 5.25                |          | 2.63                 |                        |
|                                | DC71306   | 21.80               |          | 0.87                 | 0.50–5.00 (U = 7.96)   |
|                                | SO-3C     | 50.02               |          | 1.34                 | 5.0–50.0 (U = 2.63)    |
|                                | DC71305   | 0.045               |          | 10.95                |                        |
| P <sub>2</sub> O <sub>5</sub>  | GBW07104  | 0.24                |          | 3.93                 | 0.045–0.20 (U = 10.95) |
|                                | GBW07105  | 0.95                |          | 2.37                 | 0.20–1.0 (U = 3.93)    |
