# Supplementary material
Source: MDPI journal article supplement (https://www.mdpi.com/2075-163X/9/7/439)
Supplement: s1 [file s1]

**Table S3.** Accuracy and precision of the ICP-MS technique used in this work referred to the Nod-A-1 (USGS) Reference Material.

|                   | <b>Be</b>       | <b>V</b>        | <b>Co</b>       | <b>Ni</b>       | <b>Cu</b>       | <b>Zn</b>       | <b>As</b>       | <b>Se</b>       | <b>Mo</b>       | <b>Sb</b>       | <b>Ba</b>       | <b>Tl</b>       | <b>Pb</b>       | <b>Th</b>       | <b>U</b>        |
|-------------------|-----------------|-----------------|-----------------|-----------------|-----------------|-----------------|-----------------|-----------------|-----------------|-----------------|-----------------|-----------------|-----------------|-----------------|-----------------|
| Detection Lim.    | <b>0.1</b>      | <b>0.2</b>      | <b>0.2</b>      | <b>1</b>        | <b>0.5</b>      | <b>2</b>        | <b>0.1</b>      | <b>1</b>        | <b>0.5</b>      | <b>0.1</b>      | <b>0.5</b>      | <b>0.1</b>      | <b>2</b>        | <b>0.1</b>      | <b>0.1</b>      |
| Blank             | <D.L            | <D.L            | <D.L            | <D.L            | 1.04            | 2.13            | 0.28            | <D.L            | <D.L            | <D.L            | <D.L            | <D.L            | <D.L            | 0.86            | 0.15            |
| Nod-A-1-1         | 6.3             | 720.2           | 3305.4          | 6694.4          | 1148.4          | 589.9           | 293.4           | 14.2            | 400.4           | 38.9            | 1576.6          | 133.1           | 909.1           | 27.2            | 8.4             |
| Nod-A-1-2         | 6.3             | 719.3           | 3311.8          | 6869.3          | 1141.4          | 583.8           | 295.1           | 14.3            | 403.2           | 38.4            | 1585.6          | 133.9           | 907.7           | 27.5            | 8.4             |
| Nod-A-1-3         | 6.3             | 721.5           | 3322.5          | 6876.5          | 1148.0          | 583.8           | 295.6           | 13.7            | 402.9           | 38.8            | 1579.2          | 133.0           | 901.5           | 26.0            | 8.3             |
| R.M. Nod-A-1      |                 |                 |                 |                 |                 |                 |                 |                 |                 |                 |                 |                 |                 |                 |                 |
| Recc. val.        |                 | <b>770.0</b>    | <b>3110.0</b>   | <b>6360.0</b>   | <b>1100.0</b>   | <b>590.0</b>    |                 |                 | <b>448.0</b>    |                 | <b>1670.0</b>   |                 | <b>846.0</b>    |                 |                 |
| Average An.       | 6.3             | 720.3           | 3313.3          | 6813.4          | 1145.9          | 585.8           | 294.7           | 14.1            | 402.2           | 38.7            | 1580.5          | 133.4           | 906.1           | 26.9            | 8.3             |
| Precision %       | 0.6             | 0.1             | 0.3             | 1.5             | 0.3             | 0.6             | 0.4             | 2.1             | 0.4             | 0.7             | 0.3             | 0.4             | 0.4             | 3.0             | 0.3             |
| Accuracy %        |                 | -6.5            | 6.5             | 7.1             | 4.2             | -0.7            |                 |                 | -10.2           |                 | -5.4            |                 | 7.1             |                 |                 |
| St. Dev.          | 0.03            | 1.07            | 8.63            | 103.11          | 3.93            | 3.49            | 1.15            | 0.30            | 1.56            | 0.26            | 4.67            | 0.49            | 4.06            | 0.81            | 0.02            |
| 2 $\sigma$        | 0.04            | 1.21            | 9.77            | 116.68          | 4.45            | 3.95            | 1.30            | 0.34            | 1.76            | 0.30            | 5.28            | 0.55            | 4.59            | 0.91            | 0.03            |
| 2 $\sigma$ %      |                 | <b>0.16</b>     | <b>0.3</b>      | <b>1.8</b>      | <b>0.4</b>      | <b>0.7</b>      |                 |                 | <b>0.4</b>      |                 | <b>0.3</b>      |                 | <b>0.5</b>      |                 |                 |
|                   | <b>Y</b>        | <b>La</b>       | <b>Ce</b>       | <b>Pr</b>       | <b>Nd</b>       | <b>Sm</b>       | <b>Eu</b>       | <b>Gd</b>       | <b>Tb</b>       | <b>Dy</b>       | <b>Ho</b>       | <b>Er</b>       | <b>Tm</b>       | <b>Yb</b>       | <b>Lu</b>       |
| Detection Lim.    | <b>0.1</b>      | <b>0.4</b>      | <b>0.4</b>      | <b>0.1</b>      |
| Blank             | $\mu\text{g/g}$ |
| Nod-A-1-1         | <D.L            |
| Nod-A-1-2         | 110.1           | 109.9           | 729.6           | 23.7            | 99.1            | 21.6            | 5.4             | 27.2            | 4.0             | 24.1            | 5.1             | 15.3            | 2.3             | 14.1            | 2.3             |
| Nod-A-1-3         | 109.6           | 111.2           | 742.6           | 24.0            | 101.7           | 22.3            | 5.5             | 27.6            | 4.0             | 24.6            | 5.1             | 15.9            | 2.3             | 14.6            | 2.3             |
| Nod-A-1-3         | 103.2           | 105.7           | 706.7           | 22.8            | 96.3            | 21.0            | 5.1             | 25.7            | 3.8             | 23.0            | 4.9             | 14.6            | 2.1             | 13.6            | 2.2             |
| R.M. Nod-A-1 Inf. |                 |                 |                 |                 |                 |                 |                 |                 |                 |                 |                 |                 |                 |                 |                 |
| val.              |                 | <b>120.0</b>    | <b>730.0</b>    |                 | <b>94.0</b>     | <b>21.0</b>     | <b>5.0</b>      | <b>26.0</b>     |                 | <b>23.0</b>     |                 | <b>12.0</b>     |                 | <b>14.0</b>     | <b>2.2</b>      |
| Average An.       | 107.7           | 108.9           | 726.3           | 23.5            | 99.0            | 21.6            | 5.4             | 26.8            | 3.9             | 23.9            | 5.0             | 15.2            | 2.2             | 14.1            | 2.3             |
| Precision %       | 3.6             | 2.7             | 2.5             | 2.6             | 2.7             | 3.1             | 4.1             | 3.8             | 2.8             | 3.3             | 3.0             | 4.2             | 4.7             | 3.4             | 3.1             |
| Accuracy %        |                 | -9.2            | -0.5            |                 | 5.3             | 3.1             | 7.2             | 3.2             |                 | 3.9             |                 | 27.0            |                 | 0.6             | 2.6             |
| St. Dev.          | 3.57            | 2.66            | 2.51            | 2.65            | 2.73            | 3.07            | 4.08            | 3.83            | 2.80            | 3.28            | 3.03            | 4.22            | 4.72            | 3.39            | 3.11            |
| 2 $\sigma$        | 4.35            | 3.28            | 20.60           | 0.70            | 3.06            | 0.75            | 0.25            | 1.16            | 0.12            | 0.89            | 0.17            | 0.73            | 0.12            | 0.54            | 0.08            |
| 2 $\sigma$ %      |                 | <b>2.7</b>      | <b>2.8</b>      |                 | <b>3.2</b>      | <b>3.5</b>      | <b>5</b>        | <b>4.5</b>      |                 | <b>3.8</b>      |                 | <b>6</b>        |                 | <b>3.8</b>      | <b>3.6</b>      |
