# Supplementary material
Source: MDPI journal article supplement (https://www.mdpi.com/2075-163X/9/7/439)
Supplement: s1 [file s1]

**Table S2.** Accuracy and precision of the XRF technique, as found in the software analysis, used in this work referred to the Nod-A-1 (USGS) Reference Material.

|                            | SiO2  | Al2O3 | Fe2O3   | CaO     | TiO2   | MnO     | K2O    | MgO    | P2O5   |
|----------------------------|-------|-------|---------|---------|--------|---------|--------|--------|--------|
|                            | (%)   | (%)   | (%)     | (%)     | (%)    | (%)     | (%)    | (%)    | (%)    |
| CRM values NOD-A-1         | 3.81  | 3.87  | 15.6    | 15.4    | 0.53   | 23.9    | 0.6    | 4.76   | 1.4    |
| NOD-A-1                    | 3.85  | 3.85  | 15.097  | 14.711  | 0.491  | 22.633  | 0.57   | 4.932  | 1.166  |
| NOD-A-1                    | 3.84  | 3.84  | 15.099  | 14.69   | 0.494  | 22.654  | 0.575  | 4.924  | 1.167  |
| NOD-A-1                    | 3.84  | 3.84  | 15.097  | 14.717  | 0.495  | 22.637  | 0.575  | 4.936  | 1.169  |
| NOD-A-1                    | 3.84  | 3.84  | 15.01   | 14.698  | 0.504  | 21.375  | 0.572  | 4.936  | 1.169  |
| NOD-A-1                    | 3.82  | 3.84  | 13.992  | 14.701  | 0.504  | 22.162  | 0.575  | 4.942  | 1.173  |
| NOD-A-1                    | 3.73  | 3.74  | 15.101  | 14.572  | 0.472  | 21.64   | 0.563  | 4.666  | 1.142  |
| Mean Concentration         | 3.821 | 3.827 | 14.8993 | 14.6815 | 0.4933 | 22.1834 | 0.5716 | 4.8893 | 1.1643 |
| Min. Concentration         | 3.73  | 3.74  | 13.992  | 14.572  | 0.472  | 21.375  | 0.563  | 4.666  | 1.142  |
| Max. Concentration         | 3.85  | 3.85  | 15.101  | 14.717  | 0.504  | 22.654  | 0.575  | 4.942  | 1.173  |
| RMS Concentration          | 0.046 | 0.042 | 0.4461  | 0.0543  | 0.0118 | 0.5621  | 0.0046 | 0.1095 | 0.0114 |
| RMS rel. Concentration (%) | 1.2   | 1.1   | 2.994   | 0.37    | 2.388  | 2.534   | 0.808  | 2.239  | 0.978  |
